# Supplementary material for: A family of robust Dirac cone materials: two-dimensional hexagonal M3X2 (M = Zn/Cd/Hg, X = Si/Ge)
Source: Royal Society of Chemistry journal article supplement (doi:10.1039/d2cp05494a), 2023-01-01
Supplement: d2cp05494a1.pdf [file d2cp05494a1.pdf]

## Supplementary Materials

### A family of robust Dirac cone materials: Two-dimensional hexagonal $M_3X_2$ ( $M = \text{Zn}/\text{Cd}/\text{Hg}$ , $X=\text{Si}/\text{Ge}$ )

Qiuyang Li<sup>a</sup>, Cuixia Yan<sup>a\*</sup>(Equal contribution), Chenchen Qi<sup>a</sup>, Shi Qiu<sup>a</sup>, Ting Yang<sup>a</sup>,  
Jinming Cai<sup>a</sup>

a. Faculty of Materials Science and Engineering, Kunming University of Science  
and Technology, Kunming, 650093, People's Republic of China

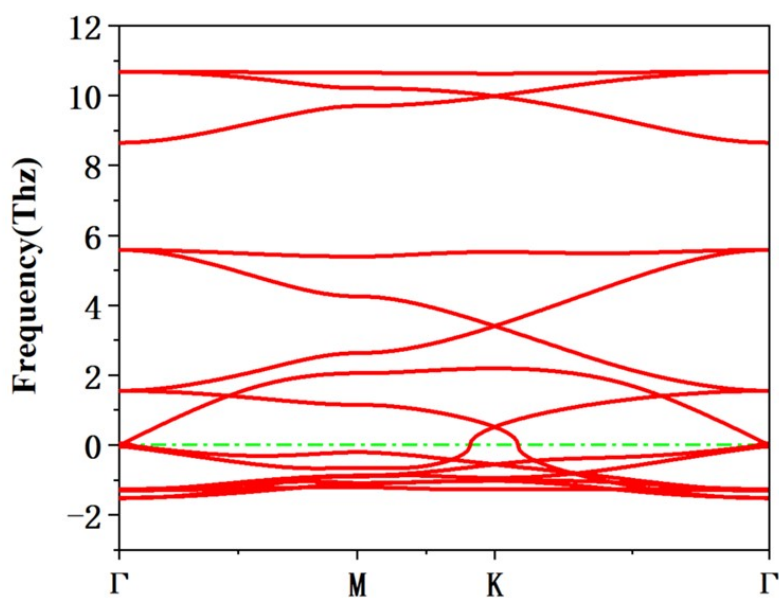

Fig.S1. Phonon spectrum of 3x3 superlattice Hg<sub>3</sub>Ge<sub>2</sub>

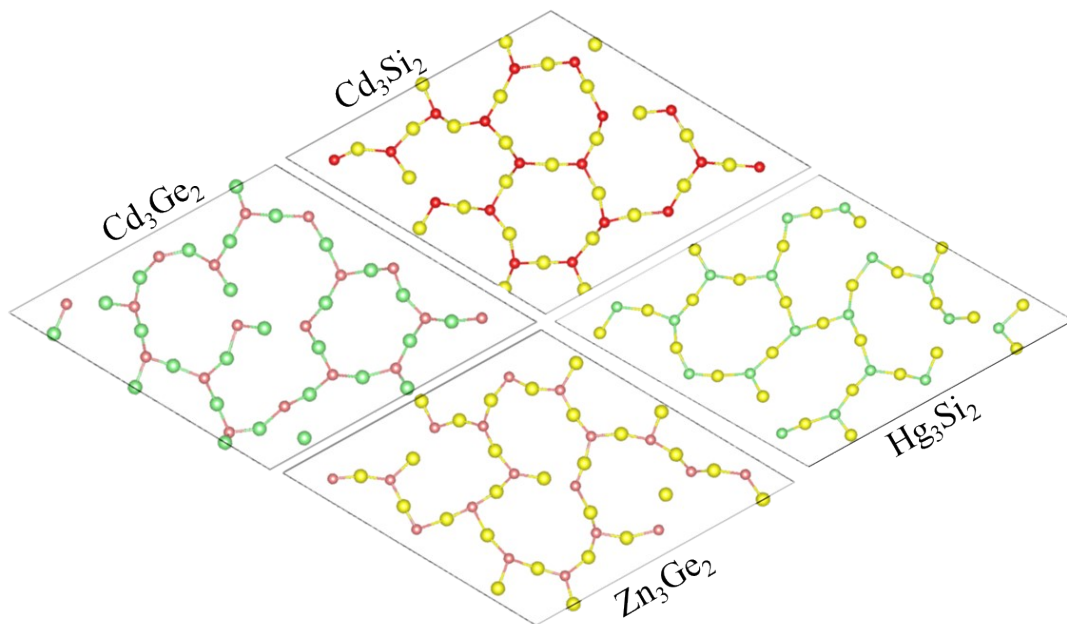

**Fig.S2** Snapshots for the equilibrium structures of the  $M_3X_2$  monolayers at 900K temperatures.

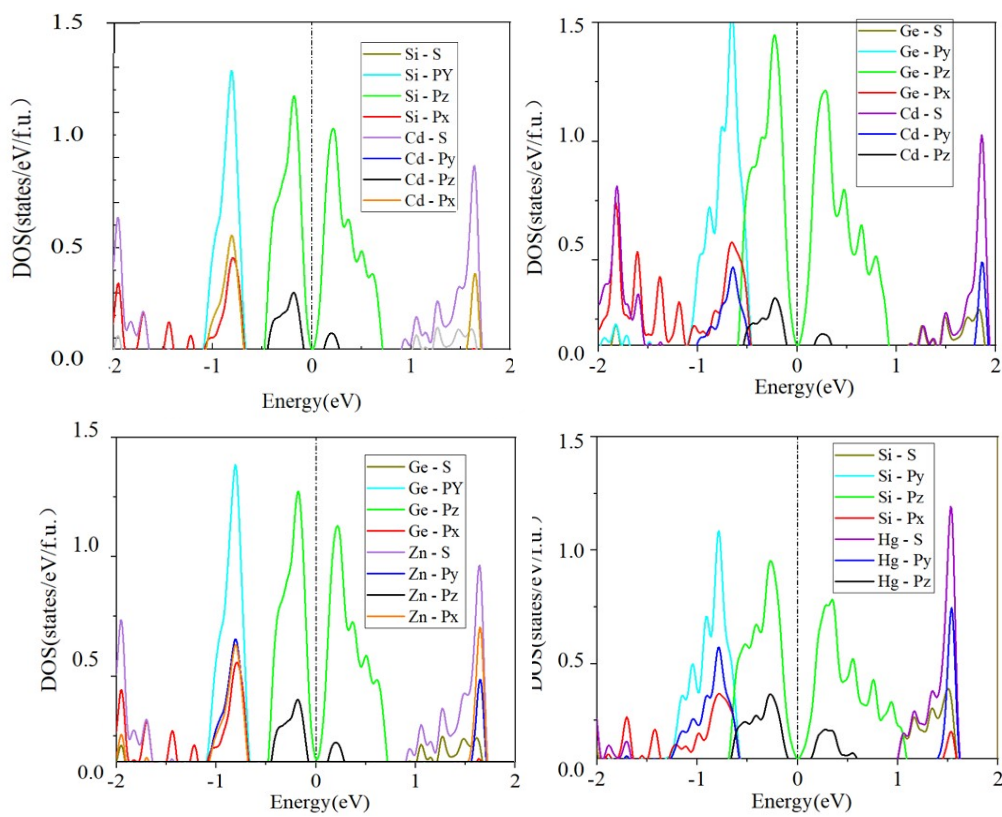

**Fig.S3** Partial density of state (PDOS) of  $M_3X_2$ .

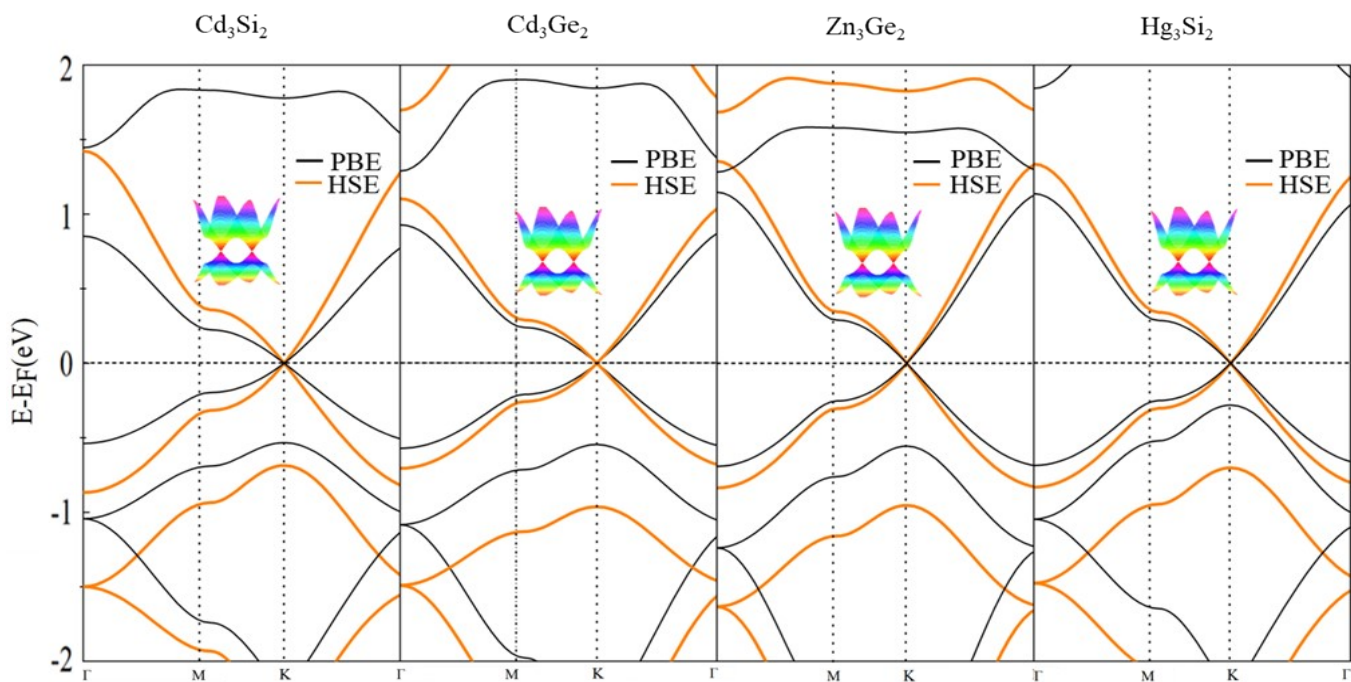

**Fig.S4** The calculated band structure (3D band structure) of the  $M_3X_2$  lattice without SOC. Yellow and black solid lines represent the HSE and PBE functional, respectively.

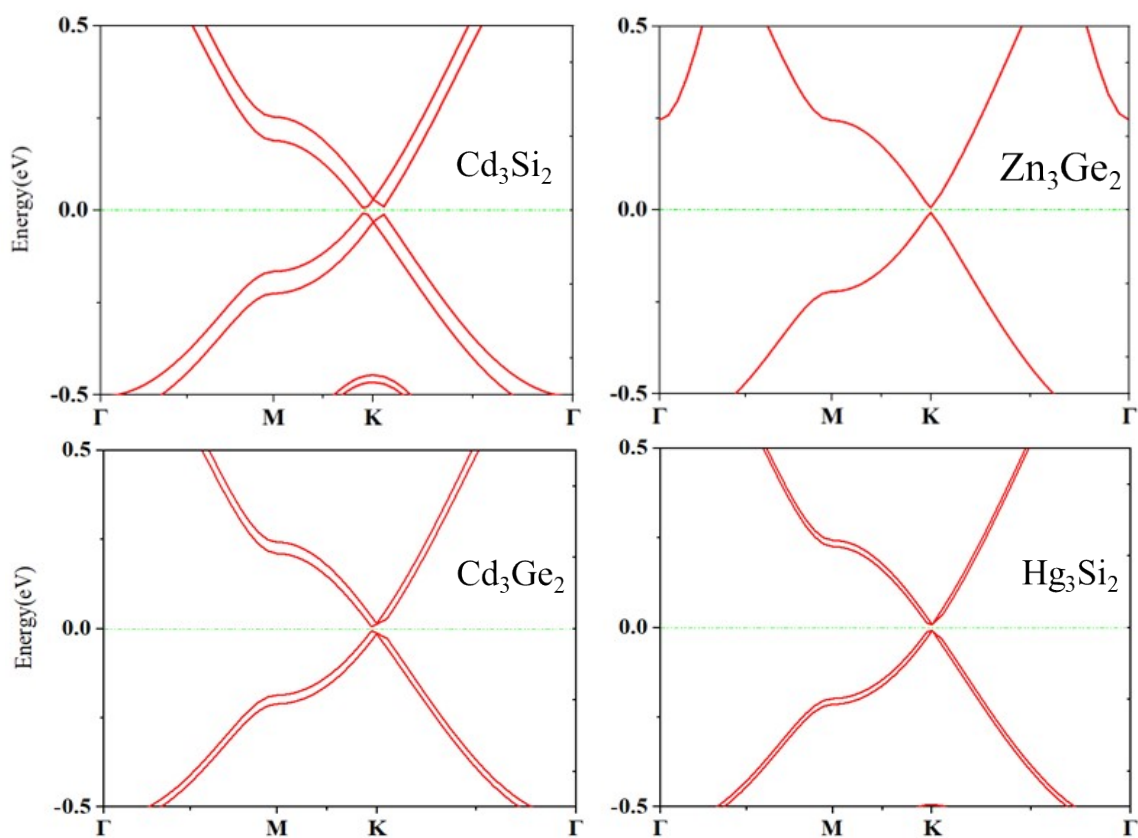

**Fig.S5** Band structures of  $M_3X_2$  with SOC around K point.

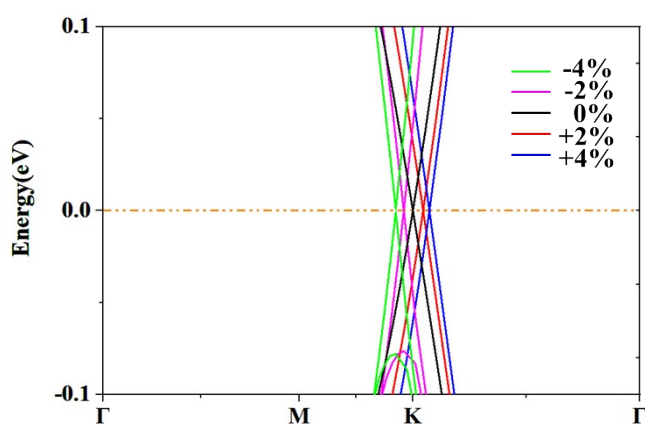

**Fig.S6** Variations of electronic band structure against different in-plane biaxial strains (-4%~+4%).

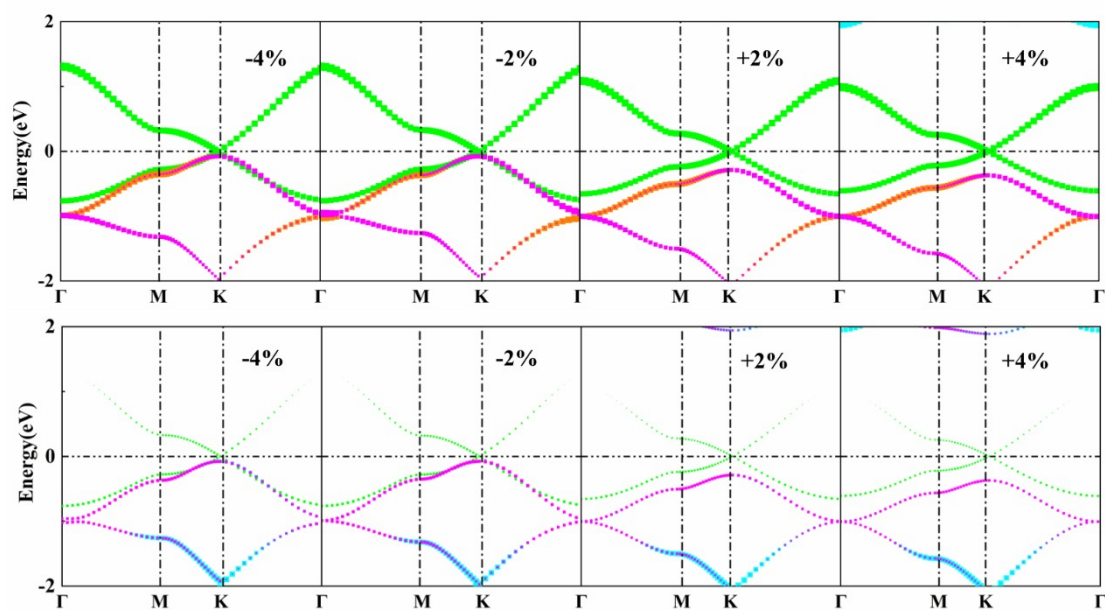

**Fig. S7** Orbital-resolved band structures of  $\text{Cd}_3\text{Si}_2$  monolayer under mild tensile or compressional strains (-4% ~ 4%), under which the Dirac cone persists evidently. The green, yellow, blue and purple dots represent the contributions from the  $p_z$ ,  $p_x$ ,  $p_y$  and  $s$  atomic orbitals, respectively.



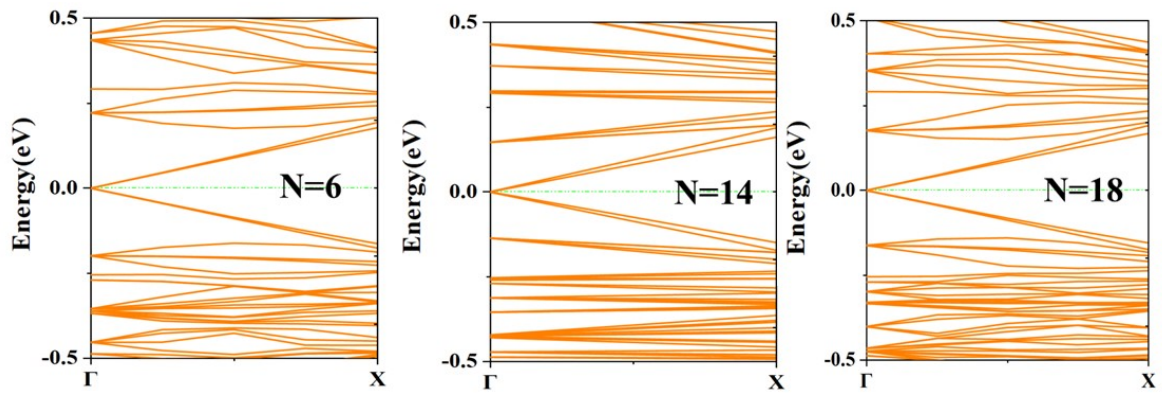

**Fig.S8** electronic band structure of 1D zigzag nanoribbons of  $\text{Cd}_3\text{Si}_2$  cut from the width( $N=6\sim 18$ ).

(a)

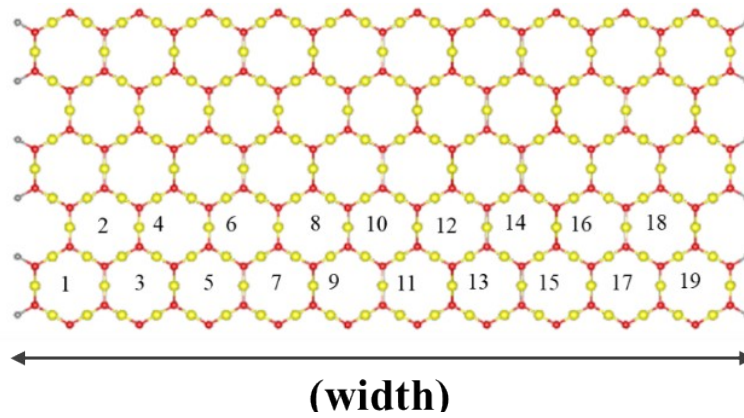

(b)

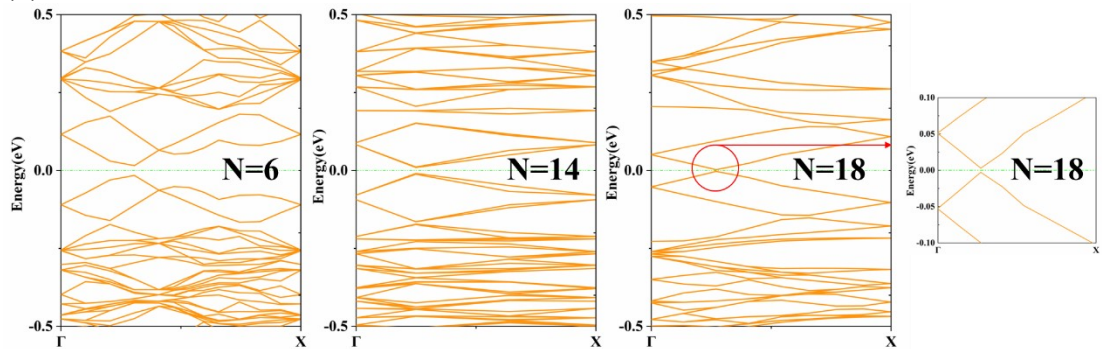

**Fig.S9** (a) Structural model of armchair nanoribbon of  $\text{Cd}_3\text{Si}_2$ . (b) Band structures of the 1D armchair nanoribbons from the  $\text{Cd}_3\text{Si}_2$ .

**Table.S1** The band gaps of  $\text{Cd}_3\text{Si}_2$  nanoribbons with various widths.

| Width(N)/Band<br>gap(eV) | 6             | 14            | 18            |
|--------------------------|---------------|---------------|---------------|
| zigzag                   | $\text{sm}^a$ | $\text{sm}^a$ | $\text{sm}^a$ |
| armchair                 | 0.0616        | 0.0313        | 0.0056        |

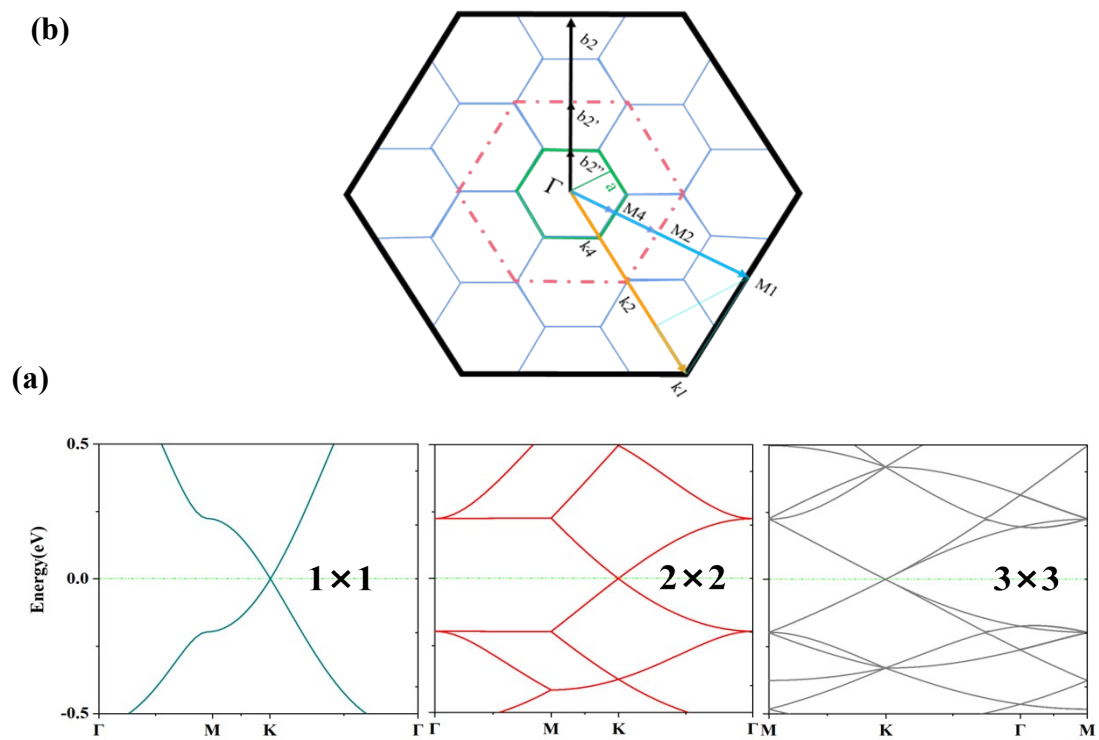

**Fig.S10** (Color online) The first Brillouin zones of the primitive (green line),  $2 \times 2$  supercell (red dash line),  $3 \times 3$  supercell (black line) of  $\text{Cd}_3\text{Si}_2$  and their corresponding band structure.

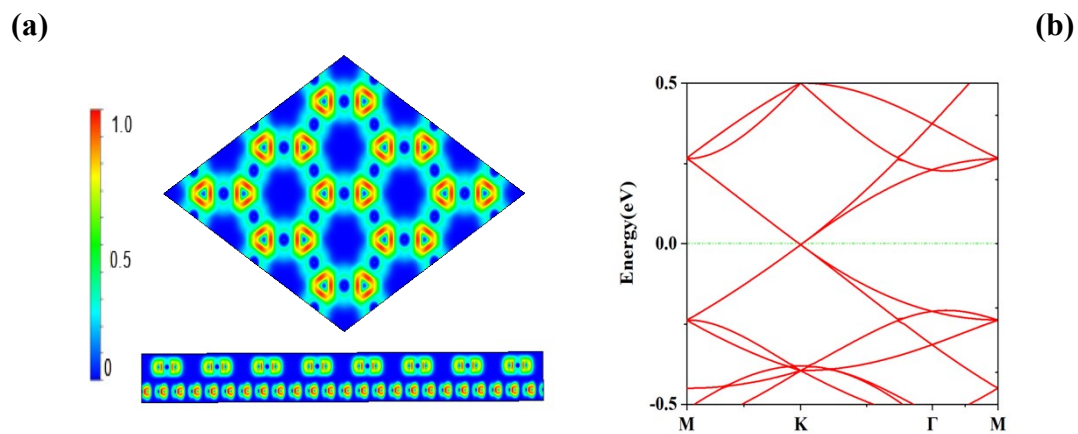

**Fig.S11** (a)The ELF of  $\text{Cd}_3\text{Si}_2/\text{h-BN}$  heterostructure (b) the band structures of  $\text{Cd}_3\text{Si}_2$  on h-BN substrate.

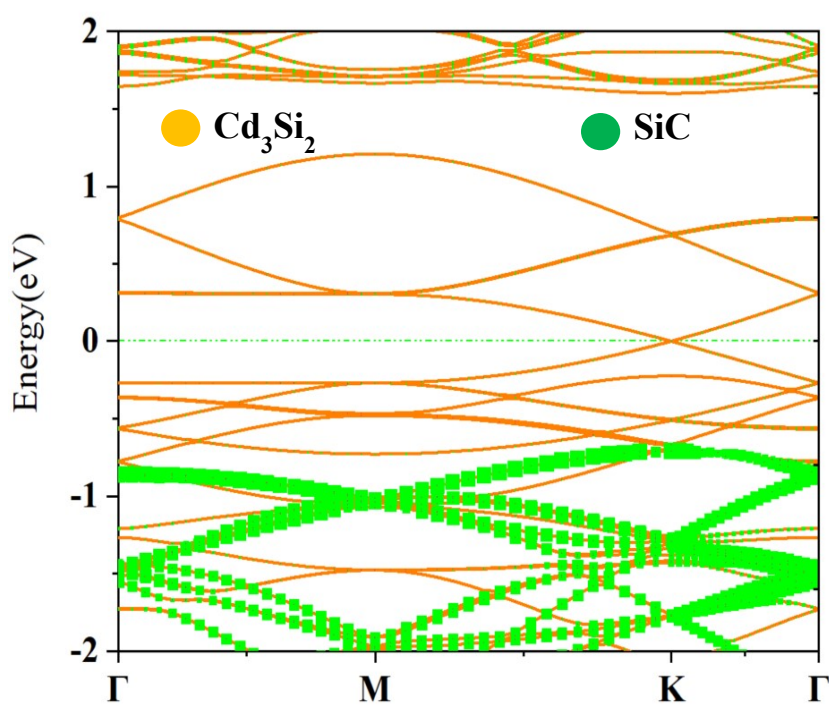

**Fig.S12** Calculated band structure of the  $\text{Cd}_3\text{Si}_2/\text{SiC}$  heterostructure.
